# Supplementary material
Source: ML conference proceedings conference paper supplement (https://openaccess.thecvf.com/content/CVPR_2019/html/Griffin_BubbleNets_Learning_to_CVPR_2019_paper.html)
Supplement: Supplementary file 1 [file Griffin_BubbleNets_Learning_to_CVPR_2019_supplemental.pdf]

Archive with 6 entries (3 files):
- 2793-supp/
- 2793-supp/BubbleNets_CVPR19_Griffin.mp4
- __MACOSX/
- __MACOSX/2793-supp/
- __MACOSX/2793-supp/._BubbleNets_CVPR19_Griffin.mp4
- __MACOSX/._2793-supp
